# Supplementary material for: A Transcriptomic Analysis of Smoking-Induced Gene Expression Alterations in Coronary Artery Disease Patients
Source: MDPI journal article supplement (doi:10.3390/ijms241813920), 2023-09-10
Supplement: s1 [file s1]

## Supplementary Materials for:

# A Transcriptomic Analysis of Smoking-Induced Gene Expression Alterations in Coronary Artery Disease Patients

Mohammed Merzah <sup>1</sup>, Szilárd Póliska <sup>2</sup>, László Balogh <sup>3</sup>, János Sándor <sup>1,4</sup>, István Szász <sup>1,4</sup>,  
Shewaye Natae <sup>1</sup> and Szilvia Fiatal <sup>1,\*</sup>

<sup>1</sup> Department of Public Health and Epidemiology, Faculty of Medicine, University of Debrecen, H-4032 Debrecen, Hungary; mohammed.merzah@med.unideb.hu (M.M.); sandor.janos@med.unideb.hu (J.S.); natae.shewaye@med.unideb.hu (S.N.)

<sup>2</sup> Department of Biochemistry and Molecular Biology, Faculty of Medicine, University of Debrecen, H-4032 Debrecen, Hungary

<sup>3</sup> Cardiology and Cardiac Surgery Clinic, University of Debrecen, H-4032 Debrecen, Hungary

<sup>4</sup> ELKH-DE Public Health Research Group, Department of Public Health and Epidemiology, Faculty of Medicine, University of Debrecen, H-4032 Debrecen, Hungary

\* Correspondence: fiatal.szilvia@med.unideb.hu

## Tables of contents:

|                                                                                                         |    |
|---------------------------------------------------------------------------------------------------------|----|
| <b>Table S1:</b> Differentially expressed genes with a fold change of >1.5 (N=61) .....                 | 2  |
| <b>Table S2:</b> Demographic characteristics of study participants (N=44). .....                        | 4  |
| <b>Table S3:</b> Differentially expressed genes with a fold change of >1.5 (N=44) .....                 | 5  |
| <b>Table S4:</b> Gene ontology of the 15 upregulated genes (N=44) .....                                 | 9  |
| <b>Table S5:</b> Gene ontology of the 105 downregulated genes (N=44) .....                              | 10 |
| <b>Table S6:</b> KEGG pathway of the DEGs (FC>1.5, N=44) .....                                          | 11 |
| <b>Table S7:</b> Differentially expressed genes among smokers based on Nicotine Dependence (N=31) ..... | 12 |

## Tables of figures:

|                                                                                                        |    |
|--------------------------------------------------------------------------------------------------------|----|
| <b>Figure S1:</b> The heatmap of the DEGs with a fold change of >1.5 (N=44) .....                      | 3  |
| <b>Figure S2:</b> The heatmap of the DEGs among smokers based on Nicotine Dependence (n=31) .....      | 14 |
| <b>Figure S3:</b> GO analysis of the DEGs among smokers categorized based on Nicotine Dependence ..... | 15 |

**Table S1.** Differentially expressed genes with a fold change of >1.5 (N=61).

| No.                        | Gene Symbol | FC   | p-value | Description                                                              |
|----------------------------|-------------|------|---------|--------------------------------------------------------------------------|
| <b>Upregulated genes</b>   |             |      |         |                                                                          |
| 1                          | GPR15       | 6.0  | 5.4E-12 | G protein-coupled receptor 15 [Source:HGNC Symbol;Acc:HGNC:4469]         |
| 2                          | IFI44       | 1.8  | 1.8E-02 | interferon induced protein 44 [Source:HGNC Symbol;Acc:HGNC:16938]        |
| 3                          | IGKV3-11    | 1.6  | 1.6E-02 | immunoglobulin kappa variable 3-11 [Source:HGNC Symbol;Acc:HGNC:5815]    |
| 4                          | IGLV1-47    | 1.5  | 2.3E-02 | immunoglobulin lambda variable 1-47 [Source:HGNC Symbol;Acc:HGNC:5880]   |
| 5                          | IGLV2-23    | 1.6  | 4.9E-02 | immunoglobulin lambda variable 2-23 [Source:HGNC Symbol;Acc:HGNC:5890]   |
| 6                          | IGLV3-21    | 1.7  | 3.2E-02 | immunoglobulin lambda variable 3-21 [Source:HGNC Symbol;Acc:HGNC:5905]   |
| <b>Downregulated genes</b> |             |      |         |                                                                          |
| 1                          | CHI3L1      | -1.5 | 4.5E-02 | chitinase 3 like 1 [Source:HGNC Symbol;Acc:HGNC:1932]                    |
| 2                          | EPB42       | -1.5 | 3.9E-02 | erythrocyte membrane protein band 4.2 [Source:HGNC Symbol;Acc:HGNC:3381] |
| 3                          | HBQ1        | -1.5 | 4.7E-02 | hemoglobin subunit theta 1 [Source:HGNC Symbol;Acc:HGNC:4833]            |
| 4                          | KLF1        | -1.6 | 1.9E-02 | Kruppel like factor 1 [Source:HGNC Symbol;Acc:HGNC:6345]                 |
| 5                          | PDZK1IP1    | -1.7 | 3.5E-03 | PDZK1 interacting protein 1 [Source:HGNC Symbol;Acc:HGNC:16887]          |
| 6                          | PTGDS       | -1.6 | 1.5E-02 | prostaglandin D2 synthase [Source:HGNC Symbol;Acc:HGNC:9592]             |
| 7                          | RETN        | -1.5 | 3.6E-02 | resistin [Source:HGNC Symbol;Acc:HGNC:20389]                             |

FC= Fold change between smokers and nonsmokers (reference).

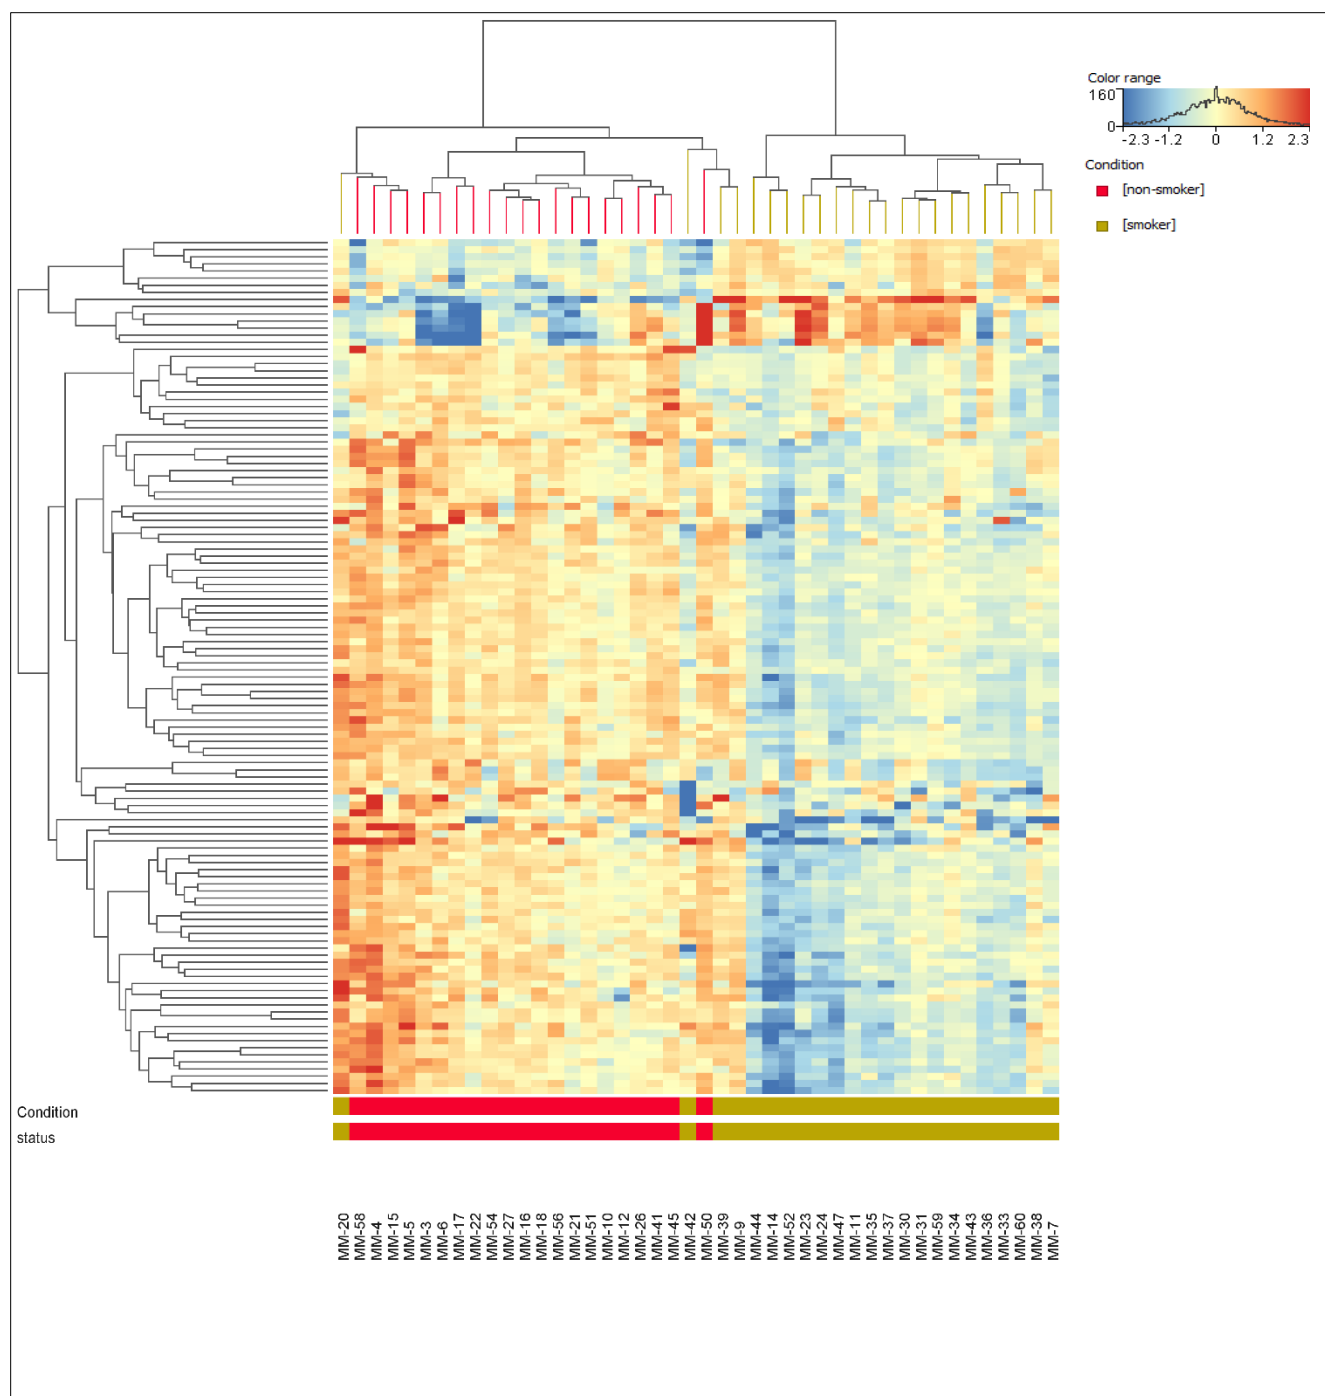

**Figure S1.** The heatmap of the DEGs with a fold change of  $>1.5$  (N=44).

**Table S2.** Demographic characteristics of study participants (N=44).

| Variables                                   | Total             | Smoking status    |                   | P-value          |
|---------------------------------------------|-------------------|-------------------|-------------------|------------------|
|                                             |                   | Smokers           | Non-smokers       |                  |
| Sex, n (%)                                  |                   |                   |                   |                  |
| <b>Male</b>                                 | <b>18 (63.6)</b>  | <b>18 (81.8)</b>  | <b>10 (45.5)</b>  | <b>&lt;0.001</b> |
| <b>Female</b>                               | <b>16 (36.4)</b>  | <b>4 (18.2)</b>   | <b>12 (54.5)</b>  |                  |
| <b>Age, median (range) years</b>            | <b>68 (32-88)</b> | <b>61 (32-75)</b> | <b>75 (54-88)</b> | <b>&lt;0.001</b> |
| Cholesterol (mmol/L), mean (SD)             | 5.0 (1.4)         | 5.3 (1.3)         | 4.7 (1.4)         | NS               |
| Triglyceride (mmol/L), mean (SD)            | 1.5 (0.6)         | 1.5 (0.5)         | 1.5 (0.7)         | NS               |
| HDL-C (mmol/L), mean (SD)                   | 1.3 (0.6)         | 1.4 (0.8)         | 1.2 (0.2)         | NS               |
| LDL-C (mmol/L), mean (SD)                   | 3.0 (1.2)         | 3.1 (1.2)         | 2.8 (1.3)         | NS               |
| <b>Family history of CAD, n (%)</b>         | <b>12 (27.3)</b>  | <b>10 (22.7)</b>  | <b>2 (9.1)</b>    | <b>0.02</b>      |
| Anticoagulation medication, n (%)           | 44 (100)          | 22 (100)          | 22 (100)          | NS               |
| BMI, mean (SD)                              | 26.3 (3.0)        | 25.6 (3.1)        | 27.0 (2.8)        | NS               |
| Blood pressure (mmHg), mean (SD)            |                   |                   |                   |                  |
| Systolic                                    | 126.1 (22.5)      | 120.6 (23.9)      | 131.6 (20.1)      | NS               |
| Diastolic                                   | 72.8 (11.4)       | 71.5 (13.3)       | 74.1 (9.4)        | NS               |
| Plasma cotinine ng/mL, mean (SD)            | 2.8 (1.6)         | 3.0 (1.5)         | 2.5(1.7)          | NS               |
| Angiography findings, n (%)                 |                   |                   |                   |                  |
| >2 arteries stenosis                        | 36 (81.8)         | 18 (81.8)         | 18 (81.8)         | NS               |
| Number of affected arteries, median (range) | 2 (1-3)           | 2 (1-3)           | 2 (1-3)           | NS               |
| LAD                                         | 37 (84.1)         | 18 (81.8)         | 19 (86.4)         | NS               |
| LM                                          | 7 (15.9)          | 5 (22.7)          | 2 (9.1)           | NS               |
| CX                                          | 26 (59.1)         | 11 (50.0)         | 15 (68.2)         | NS               |
| RCA                                         | 26 (59.1)         | 14 (63.6)         | 12 (54.5)         | NS               |

n = number of subject; NS= Non-significant; SD= Standard deviation. LAD= Left anterior descending artery; LM= Left main coronary artery; CX= Circumflex artery; RCA= Right coronary artery; Bold text identifies significant differences between study groups.

**Table S3.** Differentially expressed genes with a fold change of >1.5 (N=44).

| No.                        | Gene Symbol | FC   | p-value | p-value* | Description                                                                                     |
|----------------------------|-------------|------|---------|----------|-------------------------------------------------------------------------------------------------|
| <b>Upregulated genes</b>   |             |      |         |          |                                                                                                 |
| 1                          | CCR7        | 1.6  | 3.5E-03 | 3.1E-02  | C-C motif chemokine receptor 7 [Source:HGNC Symbol;Acc:HGNC:1608]                               |
| 2                          | CD28        | 1.6  | 4.5E-05 | 2.6E-03  | CD28 molecule [Source:HGNC Symbol;Acc:HGNC:1653]                                                |
| 3                          | GPR15       | 7.5  | 1.8E-13 | 1.4E-09  | G protein-coupled receptor 15 [Source:HGNC Symbol;Acc:HGNC:4469]                                |
| 4                          | IGHA2       | 2.6  | 2.8E-03 | 2.8E-02  | immunoglobulin heavy constant alpha 2 (A2m marker) [Source:HGNC Symbol;Acc:HGNC:5479]           |
| 5                          | IGKV3-11    | 2.2  | 2.2E-04 | 6.2E-03  | immunoglobulin kappa variable 3-11 [Source:HGNC Symbol;Acc:HGNC:5815]                           |
| 6                          | IGLC1       | 2.0  | 6.8E-03 | 4.5E-02  | immunoglobulin lambda constant 1 [Source:HGNC Symbol;Acc:HGNC:5855]                             |
| 7                          | IGLL5       | 1.9  | 7.3E-03 | 4.6E-02  | immunoglobulin lambda like polypeptide 5 [Source:HGNC Symbol;Acc:HGNC:38476]                    |
| 8                          | IGLV3-21    | 2.4  | 3.4E-03 | 3.0E-02  | immunoglobulin lambda variable 3-21 [Source:HGNC Symbol;Acc:HGNC:5905]                          |
| 9                          | ITGA6       | 1.5  | 5.5E-06 | 7.7E-04  | integrin subunit alpha 6 [Source:HGNC Symbol;Acc:HGNC:6142]                                     |
| 10                         | JCHAIN      | 2.1  | 4.9E-03 | 3.8E-02  | joining chain of multimeric IgA and IgM [Source:HGNC Symbol;Acc:HGNC:5713]                      |
| 11                         | LEF1        | 1.7  | 2.1E-05 | 1.6E-03  | lymphoid enhancer binding factor 1 [Source:HGNC Symbol;Acc:HGNC:6551]                           |
| 12                         | RCAN3       | 1.5  | 3.6E-05 | 2.2E-03  | RCAN family member 3 [Source:HGNC Symbol;Acc:HGNC:3042]                                         |
| 13                         | TRAT1       | 1.6  | 4.8E-04 | 1.0E-02  | T cell receptor associated transmembrane adaptor 1 [Source:HGNC Symbol;Acc:HGNC:30698]          |
| 14                         | TRAV13-1    | 1.5  | 0.0003  | 0.0081   | T cell receptor alpha variable 13-1 [Source:HGNC Symbol;Acc:HGNC:12108]                         |
| 15                         | TRAV4       | 1.6  | 4.6E-03 | 3.6E-02  | T cell receptor alpha variable 4 [Source:HGNC Symbol;Acc:HGNC:12140]                            |
| <b>Downregulated genes</b> |             |      |         |          |                                                                                                 |
| 1                          | ABALON      | -2.1 | 6.9E-06 | 8.6E-04  | apoptotic BCL2L1-antisense long non-coding RNA [Source:HGNC Symbol;Acc:HGNC:49667]              |
| 2                          | ADIPOR1     | -1.5 | 1.9E-04 | 5.8E-03  | adiponectin receptor 1 [Source:HGNC Symbol;Acc:HGNC:24040]                                      |
| 3                          | AHSP        | -2.3 | 2.1E-04 | 6.1E-03  | alpha hemoglobin stabilizing protein [Source:HGNC Symbol;Acc:HGNC:18075]                        |
| 4                          | ALAS2       | -2.2 | 1.1E-03 | 1.6E-02  | 5'-aminolevulinate synthase 2 [Source:HGNC Symbol;Acc:HGNC:397]                                 |
| 5                          | ANK1        | -1.9 | 3.2E-05 | 2.0E-03  | ankyrin 1 [Source:HGNC Symbol;Acc:HGNC:492]                                                     |
| 6                          | ARHGEF40    | -1.5 | 1.7E-04 | 5.4E-03  | Rho guanine nucleotide exchange factor 40 [Source:HGNC Symbol;Acc:HGNC:25516]                   |
| 7                          | ASCC2       | -1.7 | 2.3E-08 | 2.6E-05  | activating signal cointegrator 1 complex subunit 2 [Source:HGNC Symbol;Acc:HGNC:24103]          |
| 8                          | BAG1        | -1.8 | 1.0E-08 | 1.3E-05  | BCL2 associated athanogene 1 [Source:HGNC Symbol;Acc:HGNC:937]                                  |
| 9                          | BCL2L1      | -2.0 | 9.3E-06 | 1.0E-03  | BCL2 like 1 [Source:HGNC Symbol;Acc:HGNC:992]                                                   |
| 10                         | BLVRB       | -1.8 | 3.6E-09 | 7.0E-06  | biliverdin reductase B [Source:HGNC Symbol;Acc:HGNC:1063]                                       |
| 11                         | CA1         | -2.4 | 4.6E-03 | 3.6E-02  | carbonic anhydrase 1 [Source:HGNC Symbol;Acc:HGNC:1368]                                         |
| 12                         | CARM1       | -1.6 | 2.2E-05 | 1.7E-03  | coactivator associated arginine methyltransferase 1 [Source:HGNC Symbol;Acc:HGNC:23393]         |
| 13                         | CYSTM1      | -1.6 | 1.1E-03 | 1.6E-02  | cysteine rich transmembrane module containing 1 [Source:HGNC Symbol;Acc:HGNC:30239]             |
| 14                         | DCAF12      | -1.6 | 7.1E-05 | 3.3E-03  | DDB1 and CUL4 associated factor 12 [Source:HGNC Symbol;Acc:HGNC:19911]                          |
| 15                         | DMTN        | -1.9 | 2.3E-05 | 1.7E-03  | dematin actin binding protein [Source:HGNC Symbol;Acc:HGNC:3382]                                |
| 16                         | DPM2        | -1.8 | 8.5E-08 | 5.9E-05  | dolichyl-phosphate mannosyltransferase subunit 2, regulatory [Source:HGNC Symbol;Acc:HGNC:3006] |
| 17                         | DUSP1       | -1.6 | 6.6E-06 | 8.3E-04  | dual specificity phosphatase 1 [Source:HGNC Symbol;Acc:HGNC:3064]                               |
| 18                         | EPB42       | -2.2 | 1.5E-06 | 3.5E-04  | erythrocyte membrane protein band 4.2 [Source:HGNC Symbol;Acc:HGNC:3381]                        |
| 19                         | FAM210B     | -1.6 | 7.2E-04 | 1.2E-02  | family with sequence similarity 210 member B [Source:HGNC Symbol;Acc:HGNC:16102]                |
| 20                         | FAXDC2      | -1.9 | 9.0E-06 | 1.0E-03  | fatty acid hydroxylase domain containing 2 [Source:HGNC Symbol;Acc:HGNC:1334]                   |

|    |             |      |         |         |                                                                                                  |
|----|-------------|------|---------|---------|--------------------------------------------------------------------------------------------------|
| 21 | FBXO7       | -1.9 | 3.4E-07 | 1.8E-04 | F-box protein 7 [Source:HGNC Symbol;Acc:HGNC:13586]                                              |
| 22 | FKBP8       | -1.7 | 2.6E-05 | 1.8E-03 | FK506 binding protein 8 [Source:HGNC Symbol;Acc:HGNC:3724]                                       |
| 23 | FUNDC2P1    | -1.8 | 4.8E-06 | 7.3E-04 | FUN14 domain containing 2 pseudogene 1 [Source:HGNC Symbol;Acc:HGNC:17253]                       |
| 24 | GATA1       | -1.8 | 5.1E-07 | 1.8E-04 | GATA binding protein 1 [Source:HGNC Symbol;Acc:HGNC:4170]                                        |
| 25 | GLRX5       | -1.6 | 1.9E-03 | 2.1E-02 | glutaredoxin 5 [Source:HGNC Symbol;Acc:HGNC:20134]                                               |
| 26 | GMPR        | -1.8 | 2.4E-04 | 6.6E-03 | guanosine monophosphate reductase [Source:HGNC Symbol;Acc:HGNC:4376]                             |
| 27 | GPR146      | -1.6 | 1.8E-03 | 2.1E-02 | G protein-coupled receptor 146 [Source:HGNC Symbol;Acc:HGNC:21718]                               |
| 28 | GPX1        | -1.6 | 2.2E-05 | 1.7E-03 | glutathione peroxidase 1 [Source:HGNC Symbol;Acc:HGNC:4553]                                      |
| 29 | GPX1P1      | -1.6 | 2.1E-05 | 1.6E-03 | glutathione peroxidase pseudogene 1 [Source:HGNC Symbol;Acc:HGNC:4560]                           |
| 30 | GUK1        | -1.6 | 1.5E-05 | 1.4E-03 | guanylate kinase 1 [Source:HGNC Symbol;Acc:HGNC:4693]                                            |
| 31 | GYPC        | -1.8 | 2.6E-06 | 5.2E-04 | glycophorin C (Gerbich blood group) [Source:HGNC Symbol;Acc:HGNC:4704]                           |
| 32 | HAGH        | -1.6 | 5.7E-06 | 7.8E-04 | hydroxyacylglutathione hydrolase [Source:HGNC Symbol;Acc:HGNC:4805]                              |
| 33 | HBA1        | -2.0 | 4.2E-07 | 1.8E-04 | hemoglobin subunit alpha 1 [Source:HGNC Symbol;Acc:HGNC:4823]                                    |
| 34 | HBA2        | -1.9 | 8.6E-07 | 2.4E-04 | hemoglobin subunit alpha 2 [Source:HGNC Symbol;Acc:HGNC:4824]                                    |
| 35 | HBB         | -2.0 | 2.5E-05 | 1.8E-03 | hemoglobin subunit beta [Source:HGNC Symbol;Acc:HGNC:4827]                                       |
| 36 | HBD         | -2.0 | 2.4E-05 | 1.7E-03 | hemoglobin subunit delta [Source:HGNC Symbol;Acc:HGNC:4829]                                      |
| 37 | HBM         | -2.3 | 1.1E-03 | 1.6E-02 | hemoglobin subunit mu [Source:HGNC Symbol;Acc:HGNC:4826]                                         |
| 38 | HBQ1        | -1.8 | 2.6E-03 | 2.6E-02 | hemoglobin subunit theta 1 [Source:HGNC Symbol;Acc:HGNC:4833]                                    |
| 39 | HMBS        | -1.5 | 3.2E-05 | 2.0E-03 | hydroxymethylbilane synthase [Source:HGNC Symbol;Acc:HGNC:4982]                                  |
| 40 | HOTAIRM1_4  | -1.6 | 2.4E-03 | 2.5E-02 | HOX antisense intergenic RNA myeloid 1 conserved region 4 [Source:RFAM;Acc:RF01978]              |
| 41 | IFIT1B      | -2.2 | 1.7E-05 | 1.5E-03 | interferon induced protein with tetratricopeptide repeats 1B [Source:HGNC Symbol;Acc:HGNC:23442] |
| 42 | IL1R2       | -1.6 | 3.5E-03 | 3.0E-02 | interleukin 1 receptor type 2 [Source:HGNC Symbol;Acc:HGNC:5994]                                 |
| 43 | JHDM1D-AS1  | -1.5 | 3.7E-05 | 2.2E-03 | JHDM1D antisense RNA 1 (head to head) [Source:HGNC Symbol;Acc:HGNC:48959]                        |
| 44 | KLC3        | -2.2 | 2.5E-05 | 1.8E-03 | kinesin light chain 3 [Source:HGNC Symbol;Acc:HGNC:20717]                                        |
| 45 | KLF1        | -2.4 | 8.7E-07 | 2.4E-04 | Kruppel like factor 1 [Source:HGNC Symbol;Acc:HGNC:6345]                                         |
| 46 | KRT1        | -2.9 | 1.9E-04 | 5.8E-03 | keratin 1 [Source:HGNC Symbol;Acc:HGNC:6412]                                                     |
| 47 | LINC00694   | -1.5 | 1.4E-03 | 1.8E-02 | long intergenic non-protein coding RNA 694 [Source:HGNC Symbol;Acc:HGNC:44570]                   |
| 48 | LYL1        | -1.7 | 9.1E-08 | 5.9E-05 | LYL1, basic helix-loop-helix family member [Source:HGNC Symbol;Acc:HGNC:6734]                    |
| 49 | MED25       | -1.5 | 3.5E-08 | 3.3E-05 | mediator complex subunit 25 [Source:HGNC Symbol;Acc:HGNC:28845]                                  |
| 50 | Metazoa_SRP | -1.7 | 1.8E-03 | 2.1E-02 | Metazoan signal recognition particle RNA [Source:RFAM;Acc:RF00017]                               |
| 51 | MFSD2B      | -1.6 | 2.9E-05 | 1.9E-03 | major facilitator superfamily domain containing 2B [Source:HGNC Symbol;Acc:HGNC:37207]           |
| 52 | MIR24-2     | -1.7 | 4.6E-07 | 1.8E-04 | microRNA 24-2 [Source:HGNC Symbol;Acc:HGNC:31608]                                                |
| 53 | MRC2        | -2.2 | 1.7E-06 | 3.6E-04 | mannose receptor C type 2 [Source:HGNC Symbol;Acc:HGNC:16875]                                    |
| 54 | MYL4        | -2.2 | 1.5E-06 | 3.6E-04 | myosin light chain 4 [Source:HGNC Symbol;Acc:HGNC:7585]                                          |
| 55 | NEAT1_3     | -2.7 | 6.7E-03 | 4.4E-02 | Nuclear enriched abundant transcript 1 conserved region 3 [Source:RFAM;Acc:RF01957]              |
| 56 | NFIX        | -1.8 | 6.3E-07 | 2.0E-04 | nuclear factor I X [Source:HGNC Symbol;Acc:HGNC:7788]                                            |
| 57 | NINJ2       | -1.5 | 2.0E-05 | 1.6E-03 | ninjurin 2 [Source:HGNC Symbol;Acc:HGNC:7825]                                                    |
| 58 | NMUR1       | -1.5 | 6.3E-03 | 4.3E-02 | neuromedin U receptor 1 [Source:HGNC Symbol;Acc:HGNC:4518]                                       |
| 59 | NPRL3       | -1.6 | 1.4E-04 | 4.7E-03 | NPR3 like, GATOR1 complex subunit [Source:HGNC Symbol;Acc:HGNC:14124]                            |
| 60 | NT5M        | -1.9 | 2.1E-04 | 6.1E-03 | 5',3'-nucleotidase, mitochondrial [Source:HGNC Symbol;Acc:HGNC:15769]                            |

|    |            |      |         |         |                                                                                                       |
|----|------------|------|---------|---------|-------------------------------------------------------------------------------------------------------|
| 61 | OR2W3      | -1.8 | 6.9E-03 | 4.5E-02 | olfactory receptor family 2 subfamily W member 3 [Source:HGNC Symbol;Acc:HGNC:15021]                  |
| 62 | OSBP2      | -2.2 | 4.4E-06 | 7.1E-04 | oxysterol binding protein 2 [Source:HGNC Symbol;Acc:HGNC:8504]                                        |
| 63 | PCSK1N     | -1.7 | 2.7E-03 | 2.7E-02 | proprotein convertase subtilisin/kexin type 1 inhibitor [Source:HGNC Symbol;Acc:HGNC:17301]           |
| 64 | PDZK1IP1   | -2.6 | 1.1E-09 | 2.8E-06 | PDZK1 interacting protein 1 [Source:HGNC Symbol;Acc:HGNC:16887]                                       |
| 65 | PHOSPHO1   | -1.7 | 3.9E-07 | 1.8E-04 | phosphoethanolamine/phosphocholine phosphatase [Source:HGNC Symbol;Acc:HGNC:16815]                    |
| 66 | PLEK2      | -1.6 | 1.9E-03 | 2.1E-02 | pleckstrin 2 [Source:HGNC Symbol;Acc:HGNC:19238]                                                      |
| 67 | PLVAP      | -2.6 | 4.6E-06 | 7.3E-04 | plasmalemma vesicle associated protein [Source:HGNC Symbol;Acc:HGNC:13635]                            |
| 68 | POLL       | -1.6 | 7.0E-08 | 5.9E-05 | DNA polymerase lambda [Source:HGNC Symbol;Acc:HGNC:9184]                                              |
| 69 | PTGDS      | -1.8 | 5.7E-03 | 4.1E-02 | prostaglandin D2 synthase [Source:HGNC Symbol;Acc:HGNC:9592]                                          |
| 70 | R3HDM4     | -1.5 | 5.2E-07 | 1.8E-04 | R3H domain containing 4 [Source:HGNC Symbol;Acc:HGNC:28270]                                           |
| 71 | RBM38      | -1.6 | 1.1E-04 | 4.2E-03 | RNA binding motif protein 38 [Source:HGNC Symbol;Acc:HGNC:15818]                                      |
| 72 | RILP       | -1.7 | 1.1E-04 | 4.1E-03 | Rab interacting lysosomal protein [Source:HGNC Symbol;Acc:HGNC:30266]                                 |
| 73 | RN7SL1     | -1.6 | 6.3E-03 | 4.3E-02 | RNA, 7SL, cytoplasmic 1 [Source:HGNC Symbol;Acc:HGNC:10038]                                           |
| 74 | RN7SL2     | -1.6 | 5.2E-03 | 3.9E-02 | RNA, 7SL, cytoplasmic 2 [Source:HGNC Symbol;Acc:HGNC:23134]                                           |
| 75 | RUNDC3A    | -2.2 | 7.2E-07 | 2.1E-04 | RUN domain containing 3A [Source:HGNC Symbol;Acc:HGNC:16984]                                          |
| 76 | SELENBP1   | -2.2 | 4.0E-05 | 2.3E-03 | selenium binding protein 1 [Source:HGNC Symbol;Acc:HGNC:10719]                                        |
| 77 | SHISA4     | -2.2 | 1.5E-03 | 1.9E-02 | shisa family member 4 [Source:HGNC Symbol;Acc:HGNC:27139]                                             |
| 78 | SLC25A39   | -1.9 | 8.4E-06 | 9.9E-04 | solute carrier family 25 member 39 [Source:HGNC Symbol;Acc:HGNC:24279]                                |
| 79 | SLC31A2    | -1.5 | 3.9E-06 | 6.4E-04 | solute carrier family 31 member 2 [Source:HGNC Symbol;Acc:HGNC:11017]                                 |
| 80 | SLC38A5    | -1.6 | 4.8E-04 | 9.9E-03 | solute carrier family 38 member 5 [Source:HGNC Symbol;Acc:HGNC:18070]                                 |
| 81 | SLC4A1     | -2.1 | 2.6E-05 | 1.8E-03 | solute carrier family 4 member 1 (Diego blood group) [Source:HGNC Symbol;Acc:HGNC:11027]              |
| 82 | SLC6A8     | -1.9 | 5.7E-05 | 2.9E-03 | solute carrier family 6 member 8 [Source:HGNC Symbol;Acc:HGNC:11055]                                  |
| 83 | SMOX       | -1.5 | 1.4E-03 | 1.8E-02 | spermine oxidase [Source:HGNC Symbol;Acc:HGNC:15862]                                                  |
| 84 | SNCA       | -2.2 | 1.4E-04 | 4.7E-03 | synuclein alpha [Source:HGNC Symbol;Acc:HGNC:11138]                                                   |
| 85 | SPTB       | -1.7 | 7.5E-04 | 1.3E-02 | spectrin beta, erythrocytic [Source:HGNC Symbol;Acc:HGNC:11274]                                       |
| 86 | ST6GALNAC4 | -1.5 | 3.1E-04 | 7.7E-03 | ST6 N-acetylgalactosaminide alpha-2,6-sialyltransferase 4 [Source:HGNC Symbol;Acc:HGNC:17846]         |
| 87 | STRADB     | -1.8 | 2.9E-04 | 7.4E-03 | STE20-related kinase adaptor beta [Source:HGNC Symbol;Acc:HGNC:13205]                                 |
| 88 | TAGLN2     | -1.5 | 3.4E-06 | 6.0E-04 | transgelin 2 [Source:HGNC Symbol;Acc:HGNC:11554]                                                      |
| 89 | TAGLN2P1   | -1.5 | 3.2E-06 | 5.9E-04 | transgelin 2 pseudogene 1 [Source:HGNC Symbol;Acc:HGNC:21739]                                         |
| 90 | TAL1       | -1.6 | 1.0E-04 | 4.0E-03 | TAL bHLH transcription factor 1, erythroid differentiation factor [Source:HGNC Symbol;Acc:HGNC:11556] |
| 91 | TESC       | -1.8 | 8.2E-08 | 5.9E-05 | tescalcin [Source:HGNC Symbol;Acc:HGNC:26065]                                                         |
| 92 | TMCC2      | -1.9 | 5.8E-05 | 3.0E-03 | transmembrane and coiled-coil domain family 2 [Source:HGNC Symbol;Acc:HGNC:24239]                     |
| 93 | TMOD1      | -1.5 | 1.8E-03 | 2.1E-02 | tropomodulin 1 [Source:HGNC Symbol;Acc:HGNC:11871]                                                    |
| 94 | TNS1       | -2.1 | 1.4E-05 | 1.4E-03 | tensin 1 [Source:HGNC Symbol;Acc:HGNC:11973]                                                          |
| 95 | TPGS2      | -1.5 | 1.9E-05 | 1.6E-03 | tubulin polyglutamylase complex subunit 2 [Source:HGNC Symbol;Acc:HGNC:24561]                         |
| 96 | TREM1      | -1.5 | 3.7E-06 | 6.4E-04 | triggering receptor expressed on myeloid cells 1 [Source:HGNC Symbol;Acc:HGNC:17760]                  |
| 97 | TRIM58     | -2.0 | 2.6E-04 | 6.9E-03 | tripartite motif containing 58 [Source:HGNC Symbol;Acc:HGNC:24150]                                    |
| 98 | TSPAN2     | -1.5 | 2.7E-04 | 7.0E-03 | tetraspanin 2 [Source:HGNC Symbol;Acc:HGNC:20659]                                                     |
| 99 | TSPAN5     | -1.8 | 4.3E-07 | 1.8E-04 | tetraspanin 5 [Source:HGNC Symbol;Acc:HGNC:17753]                                                     |

|     |       |      |         |         |                                                                             |
|-----|-------|------|---------|---------|-----------------------------------------------------------------------------|
| 100 | UBB   | -2.0 | 3.4E-07 | 1.8E-04 | ubiquitin B [Source:HGNC Symbol;Acc:HGNC:12463]                             |
| 101 | UBBP1 | -1.9 | 1.3E-06 | 3.2E-04 | ubiquitin B pseudogene 1 [Source:HGNC Symbol;Acc:HGNC:12464]                |
| 102 | UBBP4 | -1.9 | 1.6E-06 | 3.6E-04 | ubiquitin B pseudogene 4 [Source:HGNC Symbol;Acc:HGNC:12467]                |
| 103 | UBXN6 | -1.7 | 5.1E-06 | 7.4E-04 | UBX domain protein 6 [Source:HGNC Symbol;Acc:HGNC:14928]                    |
| 104 | VWCE  | -2.4 | 6.3E-06 | 8.1E-04 | von Willebrand factor C and EGF domains [Source:HGNC Symbol;Acc:HGNC:26487] |
| 105 | YBX3  | -1.6 | 7.8E-04 | 1.3E-02 | Y-box binding protein 3 [Source:HGNC Symbol;Acc:HGNC:2428]                  |

---

FC = Fold change between smokers and nonsmokers (reference). \* corrected p-value.



**Table S4.** Gene ontology of the 15 upregulated genes (N=44).

| Term ID                   | Term description                                                   | Strength | FDR    | Matching proteins in our network (labels)    |
|---------------------------|--------------------------------------------------------------------|----------|--------|----------------------------------------------|
| <b>Biological process</b> |                                                                    |          |        |                                              |
| GO:0050900                | Leukocyte migration                                                | 1.54     | 0.0018 | CCR7,IGJ,GPR15,ITGA6,IGLL5                   |
| GO:0002376                | Immune system process                                              | 0.85     | 0.0035 | CCR7,IGJ,LEF1,GPR15,TRAT1,CD28,ITGA6,IGLL5   |
| GO:0016477                | Cell migration                                                     | 1.16     | 0.0035 | CCR7,IGJ,LEF1,GPR15,ITGA6,IGLL5              |
| GO:0022409                | Positive regulation of cell-cell adhesion                          | 1.5      | 0.0099 | CCR7,LEF1,CD28,ITGA6                         |
| GO:0051251                | Positive regulation of lymphocyte activation                       | 1.48     | 0.0099 | CCR7,LEF1,CD28,IGLL5                         |
| GO:0002250                | Adaptive immune response                                           | 1.44     | 0.012  | IGJ,LEF1,TRAT1,IGLL5                         |
| GO:0045060                | Negative thymic T cell selection                                   | 2.6      | 0.0151 | CCR7,CD28                                    |
| GO:0002863                | Positive regulation of inflammatory response to antigenic stimulus | 2.56     | 0.0156 | CCR7,CD28                                    |
| GO:0006955                | Immune response                                                    | 0.91     | 0.0157 | CCR7,IGJ,LEF1,TRAT1,CD28,IGLL5               |
| GO:0002684                | Positive regulation of immune system process                       | 1.06     | 0.0192 | CCR7,LEF1,TRAT1,CD28,IGLL5                   |
| GO:0030217                | T cell differentiation                                             | 1.66     | 0.0192 | CCR7,LEF1,CD28                               |
| GO:0050862                | Positive regulation of T cell receptor signaling pathway           | 2.46     | 0.0192 | CCR7,TRAT1                                   |
| GO:0044419                | Interspecies interaction between organisms                         | 0.84     | 0.0292 | CCR7,IGJ,LEF1,GPR15,CD28,IGLL5               |
| GO:0051897                | Positive regulation of protein kinase B signaling                  | 1.58     | 0.0292 | CCR7,TRAT1,CD28                              |
| GO:0032673                | Regulation of interleukin-4 production                             | 2.18     | 0.0372 | LEF1,CD28                                    |
| GO:0050851                | Antigen receptor-mediated signaling pathway                        | 1.52     | 0.0372 | TRAT1,CD28,IGLL5                             |
| GO:0050870                | Positive regulation of T cell activation                           | 1.49     | 0.0403 | CCR7,LEF1,CD28                               |
| GO:0007165                | Signal transduction                                                | 0.55     | 0.0407 | CCR7,LEF1,GPR15,TRAT1,CD28,RCAN3,ITGA6,IGLL5 |
| GO:0050778                | Positive regulation of immune response                             | 1.16     | 0.0407 | CCR7,TRAT1,CD28,IGLL5                        |
| GO:0050900                | Leukocyte migration                                                | 1.54     | 0.0018 |                                              |
| <b>Cellular Component</b> |                                                                    |          |        |                                              |
| GO:0009897                | External side of plasma membrane                                   | 1.42     | 0.0115 | CCR7,CD28,ITGA6,IGLL5                        |
| GO:0042571                | Immunoglobulin complex, circulating                                | 2.79     | 0.0115 | IGJ,IGLL5                                    |
| GO:0098636                | Protein complex involved in cell adhesion                          | 2.09     | 0.0422 | CD28,ITGA6                                   |

GO = Gene ontology; FDR= False discovery rate.

**Table S5.** Gene ontology of the 105 downregulated genes (N=44).

| Term ID                   | Term description                                    | Strength | FDR      | Matching proteins in our network (labels)                                                                                                                                                                                                |
|---------------------------|-----------------------------------------------------|----------|----------|------------------------------------------------------------------------------------------------------------------------------------------------------------------------------------------------------------------------------------------|
| <b>Biological process</b> |                                                     |          |          |                                                                                                                                                                                                                                          |
| GO:0030218                | Erythrocyte differentiation                         | 1.37     | 3.03E-06 | SLC4A1,KLF1,TAL1,EPB42,AHSP,ALAS2,FAM210B,GATA1,DMTN                                                                                                                                                                                     |
| GO:0042744                | Hydrogen peroxide catabolic process                 | 1.73     | 3.03E-06 | HBQ1,HBA2,HBA1,HBB,HBM,HBD,GPX1                                                                                                                                                                                                          |
| GO:0048821                | Erythrocyte development                             | 1.64     | 3.03E-06 | SLC4A1,TAL1,EPB42,ALAS2,FAM210B,GATA1,DMTN                                                                                                                                                                                               |
| GO:0061515                | Myeloid cell development                            | 1.45     | 3.03E-06 | SLC4A1,TAL1,EPB42,ALAS2,TSPAN2,FAM210B,GATA1,DMTN                                                                                                                                                                                        |
| GO:0030099                | Myeloid cell differentiation                        | 0.98     | 0.00016  | SLC4A1,KLF1,TAL1,EPB42,AHSP,ALAS2,TSPAN2,FAM210B,GATA1,DMTN                                                                                                                                                                              |
| GO:0098869                | Cellular oxidant detoxification                     | 1.22     | 0.00042  | HBQ1,HBA2,HBA1,HBB,HBM,HBD,GPX1                                                                                                                                                                                                          |
| GO:0015701                | Bicarbonate transport                               | 1.39     | 0.0023   | HBA2,SLC4A1,HBA1,HBB,CA1                                                                                                                                                                                                                 |
| GO:0045639                | Positive regulation of myeloid cell differentiation | 1.11     | 0.0071   | TAL1,FAXDC2,TESC,TRIM58,FAM210B,GATA1                                                                                                                                                                                                    |
| GO:0002520                | Immune system development                           | 0.63     | 0.0087   | SLC4A1,LYL1,KLF1,TAL1,EPB42,AHSP,GLRX5,ALAS2,TSPAN2,POLL,FAM210B,GATA1,DMTN                                                                                                                                                              |
| GO:0030097                | Hemopoiesis                                         | 0.65     | 0.0109   | SLC4A1,LYL1,KLF1,TAL1,EPB42,AHSP,GLRX5,ALAS2,TSPAN2,FAM210B,GATA1,DMTN                                                                                                                                                                   |
| GO:0045648                | Positive regulation of erythrocyte differentiation  | 1.42     | 0.0144   | TAL1,TRIM58,FAM210B,GATA1                                                                                                                                                                                                                |
| GO:0042168                | Heme metabolic process                              | 1.41     | 0.0154   | BLVRB,HMBS,ALAS2,SLC25A39                                                                                                                                                                                                                |
| GO:0020027                | Hemoglobin metabolic process                        | 1.76     | 0.0194   | EPB42,AHSP,ALAS2                                                                                                                                                                                                                         |
| GO:0043249                | Erythrocyte maturation                              | 1.63     | 0.038    | TAL1,EPB42,FAM210B                                                                                                                                                                                                                       |
| <b>Molecular function</b> |                                                     |          |          |                                                                                                                                                                                                                                          |
| GO:0005344                | Oxygen carrier activity                             | 1.96     | 1.06E-06 | HBQ1,HBA2,HBA1,HBB,HBM,HBD                                                                                                                                                                                                               |
| GO:0019825                | Oxygen binding                                      | 1.55     | 6.60E-05 | HBQ1,HBA2,HBA1,HBB,HBM,HBD                                                                                                                                                                                                               |
| GO:0030492                | Hemoglobin binding                                  | 1.98     | 0.00034  | SLC4A1,AHSP,HBB,HBD                                                                                                                                                                                                                      |
| GO:0043177                | Organic acid binding                                | 0.87     | 0.0129   | HBQ1,HBA2,HBA1,ALAS2,HBB,HBM,PTGDS,HBD                                                                                                                                                                                                   |
| GO:0020037                | Heme binding                                        | 0.98     | 0.0327   | HBQ1,HBA2,HBA1,HBB,HBM,HBD                                                                                                                                                                                                               |
| <b>Cellular Component</b> |                                                     |          |          |                                                                                                                                                                                                                                          |
| GO:0005833                | Hemoglobin complex                                  | 2.09     | 3.19E-09 | HBQ1,HBA2,AHSP,HBA1,HBB,HBM,HBD                                                                                                                                                                                                          |
| GO:0031838                | Haptoglobin-hemoglobin complex                      | 2.06     | 8.98E-08 | HBQ1,HBA2,HBA1,HBB,HBM,HBD                                                                                                                                                                                                               |
| GO:0030863                | Cortical cytoskeleton                               | 1.12     | 0.0047   | GYPC,TMOD1,SLC4A1,EPB42,DMTN,SPTB                                                                                                                                                                                                        |
| GO:0014731                | Spectrin-associated cytoskeleton                    | 1.85     | 0.009    | ANK1,DMTN,SPTB                                                                                                                                                                                                                           |
| GO:0072562                | Blood microparticle                                 | 1.05     | 0.009    | HBA2,KRT1,SLC4A1,HBA1,HBB,HBD                                                                                                                                                                                                            |
| GO:0005829                | Cytosol                                             | 0.23     | 0.0435   | STRADB,HBQ1,YBX3,HBA2,KRT1,TMOD1,GMPT,BLVRB,ANK1,FBXO7,HMBS,ARHGEF40,UBXN6,RILP,BCL2L1,UBB,AHSP,HBA1,CARM1,OSBP2,HB B,TESC,SNCA,MYL4,RBM38,HBM,GUK1,TAGLN2,IFIT1B,HBD,HAGH,SELE NBP1,PHOSPHO1,GPX1,RUNDC3A,BAG1,DMTN,CA1,SPTB,FKBP8,SMOX |
| GO:0071682                | Endocytic vesicle lumen                             | 1.5      | 0.0435   | HBA2,HBA1,HBB                                                                                                                                                                                                                            |

GO = Gene ontology; FDR= False discovery rate.

**Table S6.** KEEG pathway of the DEGs (FC>1.5, N=44).

| Term ID                    | Term description                                              | Strength | FDR    | Matching proteins in our network (labels) |
|----------------------------|---------------------------------------------------------------|----------|--------|-------------------------------------------|
| <b>Downregulated genes</b> |                                                               |          |        |                                           |
| hsa04060                   | Cytokine-cytokine receptor interaction                        | 1.21     | 0.014  | CCR7,IL7R,CCR4,IL2RA                      |
| hsa04061                   | Viral protein interaction with cytokine and cytokine receptor | 1.56     | 0.014  | CCR7,CCR4,IL2RA                           |
| hsa04640                   | Hematopoietic cell lineage                                    | 1.58     | 0.014  | IL7R,IL2RA,ITGA6                          |
| hsa05200                   | Pathways in cancer                                            | 1.05     | 0.014  | LEF1,IL7R,TCF7,IL2RA,ITGA6                |
| hsa05412                   | Arrhythmogenic right ventricular cardiomyopathy               | 1.66     | 0.014  | LEF1,TCF7,ITGA6                           |
| hsa05167                   | Kaposi sarcoma-associated herpesvirus infection               | 1.27     | 0.027  | LEF1,CCR4,TCF7                            |
| hsa05216                   | Thyroid cancer                                                | 1.81     | 0.027  | LEF1,TCF7                                 |
| hsa05213                   | Endometrial cancer                                            | 1.61     | 0.049  | LEF1,TCF7                                 |
| <b>Downregulated genes</b> |                                                               |          |        |                                           |
| hsa00860                   | Porphyrin and chlorophyll metabolism                          | 1.27     | 0.0301 | BLVRB,HMBS,ALAS2,FECH                     |

has = Homo sapiens (human); FDR= False discovery rate.

**Table S7.** Differentially expressed genes among smokers based on nicotine dependence (N=31).

| Gene Symbol | p-value | FC high ND vs. low ND | Regulation high ND vs. low ND | FC low moderate ND vs. low ND | Regulation low moderate ND vs. low ND | FC moderate ND vs. low ND | Regulation moderate ND vs. low ND | Description                                                                                            |
|-------------|---------|-----------------------|-------------------------------|-------------------------------|---------------------------------------|---------------------------|-----------------------------------|--------------------------------------------------------------------------------------------------------|
| ADPGK-AS1   | 0.03    | 1.6                   | up                            | 1.5                           | up                                    | 1.2                       | up                                | ADPGK antisense RNA 1 [Source:HGNC Symbol;Acc:HGNC:44144]                                              |
| ASB16       | 0.01    | 1.5                   | up                            | 1.3                           | up                                    | 1.1                       | up                                | ankyrin repeat and SOCS box containing 16 [Source:HGNC Symbol;Acc:HGNC:19768]                          |
| HRH4        | 0.04    | 1.6                   | up                            | -1.5                          | down                                  | -1.6                      | down                              | histamine receptor H4 [Source:HGNC Symbol;Acc:HGNC:17383]                                              |
| HCG4P5      | 0.01    | 1.6                   | up                            | -1.1                          | down                                  | -2.3                      | down                              | HLA complex group 4 pseudogene 5 [Source:HGNC Symbol;Acc:HGNC:22925]                                   |
| IGKV1-12    | 0.02    | 9.1                   | up                            | 1.8                           | up                                    | 4.2                       | up                                | immunoglobulin kappa variable 1-12 [Source:HGNC Symbol;Acc:HGNC:5730]                                  |
| HLA-A       | 0.01    | 1.8                   | up                            | 1.7                           | up                                    | -2.2                      | down                              | major histocompatibility complex, class I, A [Source:HGNC Symbol;Acc:HGNC:4931]                        |
| RN7SL2      | 0.04    | 2.4                   | up                            | 2.0                           | up                                    | 1.4                       | up                                | RNA, 7SL, cytoplasmic 2 [Source:HGNC Symbol;Acc:HGNC:23134]                                            |
| SCGB3A1     | 0.01    | 30.2                  | up                            | 3.7                           | up                                    | 1.6                       | up                                | secretoglobin family 3A member 1 [Source:HGNC Symbol;Acc:HGNC:18384]                                   |
| SPTLC1P2    | 0.03    | 2.4                   | up                            | 1.6                           | up                                    | 1.3                       | up                                | serine palmitoyltransferase long chain base subunit 1 pseudogene 2 [Source:HGNC Symbol;Acc:HGNC:39669] |
| SLC29A1     | 0.03    | 1.5                   | up                            | -1.2                          | down                                  | -1.7                      | down                              | solute carrier family 29 member 1 (Augustine blood group) [Source:HGNC Symbol;Acc:HGNC:11003]          |
| TRAJ33      | 0.04    | 1.8                   | up                            | -1.9                          | down                                  | -1.5                      | down                              | T cell receptor alpha joining 33 [Source:HGNC Symbol;Acc:HGNC:12063]                                   |
| UBE2SP2     | 0.01    | 1.6                   | up                            | 2.0                           | up                                    | 1.3                       | up                                | ubiquitin conjugating enzyme E2 S pseudogene 2 [Source:HGNC Symbol;Acc:HGNC:32196]                     |
| USP9Y       | 0.04    | 19.0                  | up                            | 3.9                           | up                                    | 3.6                       | up                                | ubiquitin specific peptidase 9, Y-linked [Source:HGNC Symbol;Acc:HGNC:12633]                           |
| ZNF696      | 0.01    | 1.9                   | up                            | 1.1                           | up                                    | 1.4                       | up                                | zinc finger protein 696 [Source:HGNC Symbol;Acc:HGNC:25872]                                            |
| ARMC10P1    | 0.04    | -2.5                  | down                          | -1.2                          | down                                  | 1.0                       | up                                | armadillo repeat containing 10 pseudogene 1 [Source:HGNC Symbol;Acc:HGNC:43646]                        |
| CACYBPP2    | 0.03    | -2.8                  | down                          | -1.9                          | down                                  | -1.6                      | down                              | calcyclin binding protein pseudogene 2 [Source:HGNC Symbol;Acc:HGNC:45123]                             |
| CCT5P1      | 0.02    | -1.9                  | down                          | -1.2                          | down                                  | -1.4                      | down                              | chaperonin containing TCP1 subunit 5 pseudogene 1 [Source:HGNC Symbol;Acc:HGNC:35135]                  |
| LYPD2       | 0.01    | -2.0                  | down                          | -4.3                          | down                                  | -8.5                      | down                              | LY6/PLAUR domain containing 2 [Source:HGNC Symbol;Acc:HGNC:25215]                                      |

|           |      |      |      |      |      |      |      |                                                                                                    |
|-----------|------|------|------|------|------|------|------|----------------------------------------------------------------------------------------------------|
| MTATP8P2  | 0.02 | -3.1 | down | -1.4 | down | -1.1 | down | mitochondrially encoded ATP synthase 8 pseudogene 2 [Source:HGNC Symbol;Acc:HGNC:44572]            |
| MTCO3P12  | 0.02 | -1.7 | down | 1.0  | up   | -1.2 | down | mitochondrially encoded cytochrome c oxidase III pseudogene 12 [Source:HGNC Symbol;Acc:HGNC:52042] |
| MTRNR2L12 | 0.01 | -1.8 | down | 1.2  | up   | -1.1 | down | MT-RNR2-like 12 [Source:HGNC Symbol;Acc:HGNC:37169]                                                |
| MTRNR2L8  | 0.02 | -2.7 | down | -1.1 | down | -1.3 | down | MT-RNR2-like 8 [Source:HGNC Symbol;Acc:HGNC:37165]                                                 |
| RPL14P3   | 0.03 | -1.9 | down | -1.3 | down | 1.0  | up   | ribosomal protein L14 pseudogene 3 [Source:HGNC Symbol;Acc:HGNC:36638]                             |
| RPS18     | 0.01 | -2.3 | down | -2.1 | down | 1.1  | up   | ribosomal protein S18 [Source:HGNC Symbol;Acc:HGNC:10401]                                          |
| RPS3AP47  | 0.04 | -2.1 | down | -1.8 | down | 1.0  | up   | ribosomal protein S3a pseudogene 47 [Source:HGNC Symbol;Acc:HGNC:36744]                            |
| SNORD58B  | 0.02 | -1.7 | down | -1.6 | down | 1.1  | up   | small nucleolar RNA, C/D box 58B [Source:HGNC Symbol;Acc:HGNC:10209]                               |
| TRGV4     | 0.04 | -1.6 | down | -2.7 | down | -2.2 | down | T cell receptor gamma variable 4 [Source:HGNC Symbol;Acc:HGNC:12289]                               |

---

FC = Fold change, ND= Nicotine dependence.

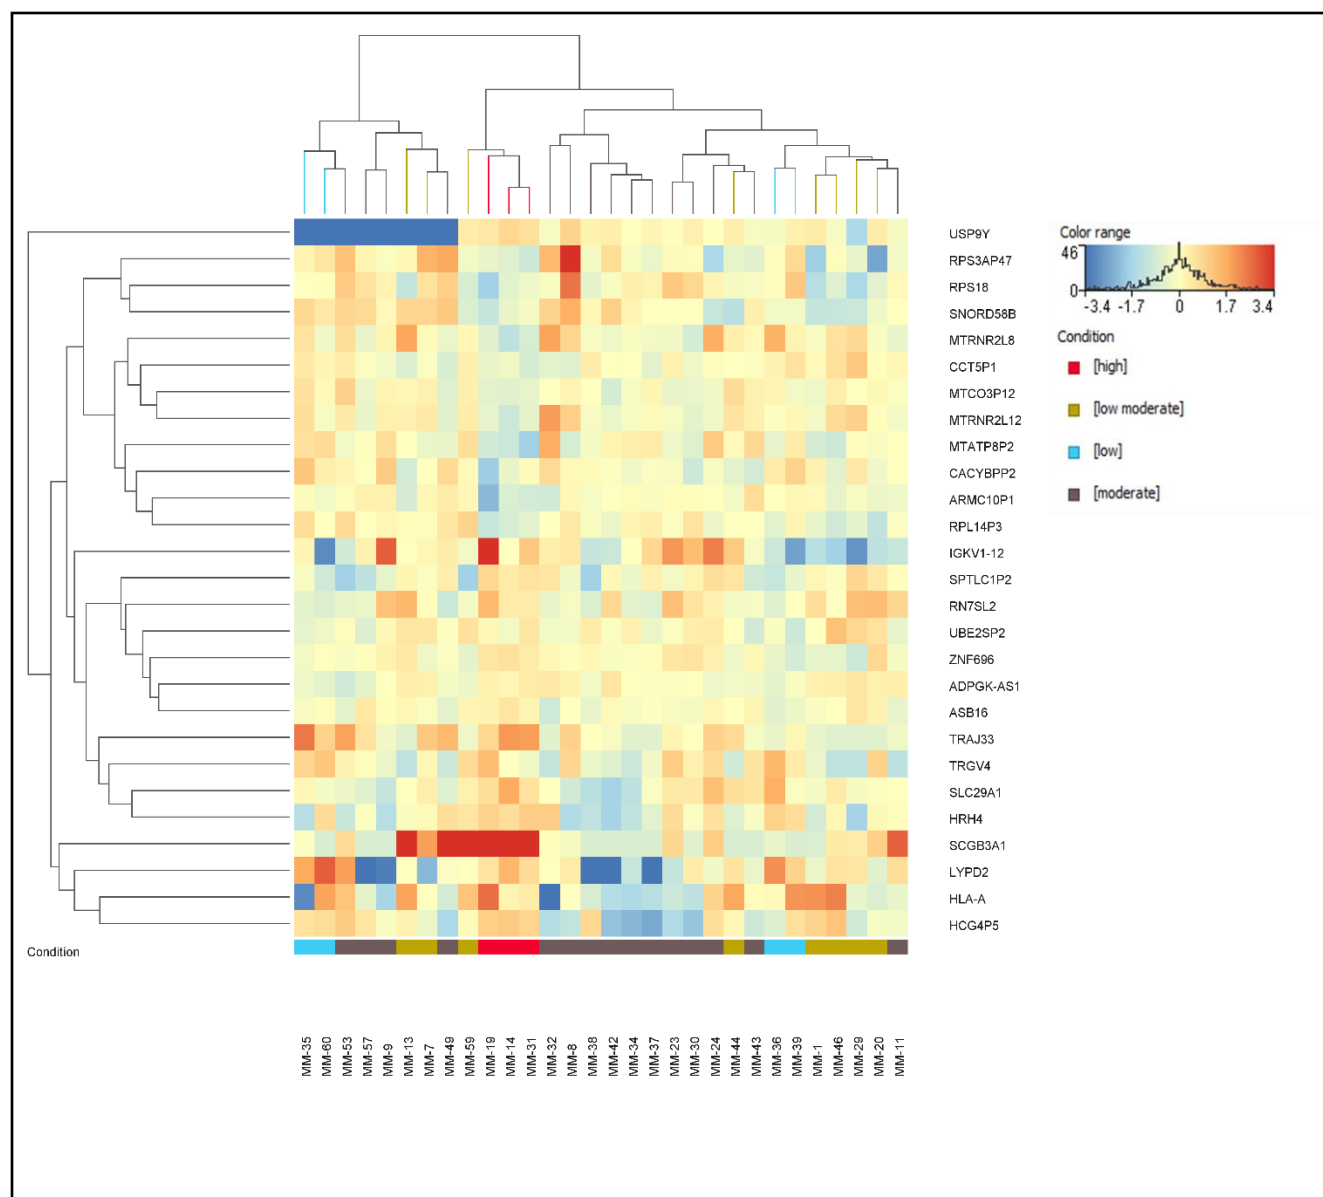

**Figure S2.** The heatmap of the DEGs among smokers based on nicotine dependence (n=31).

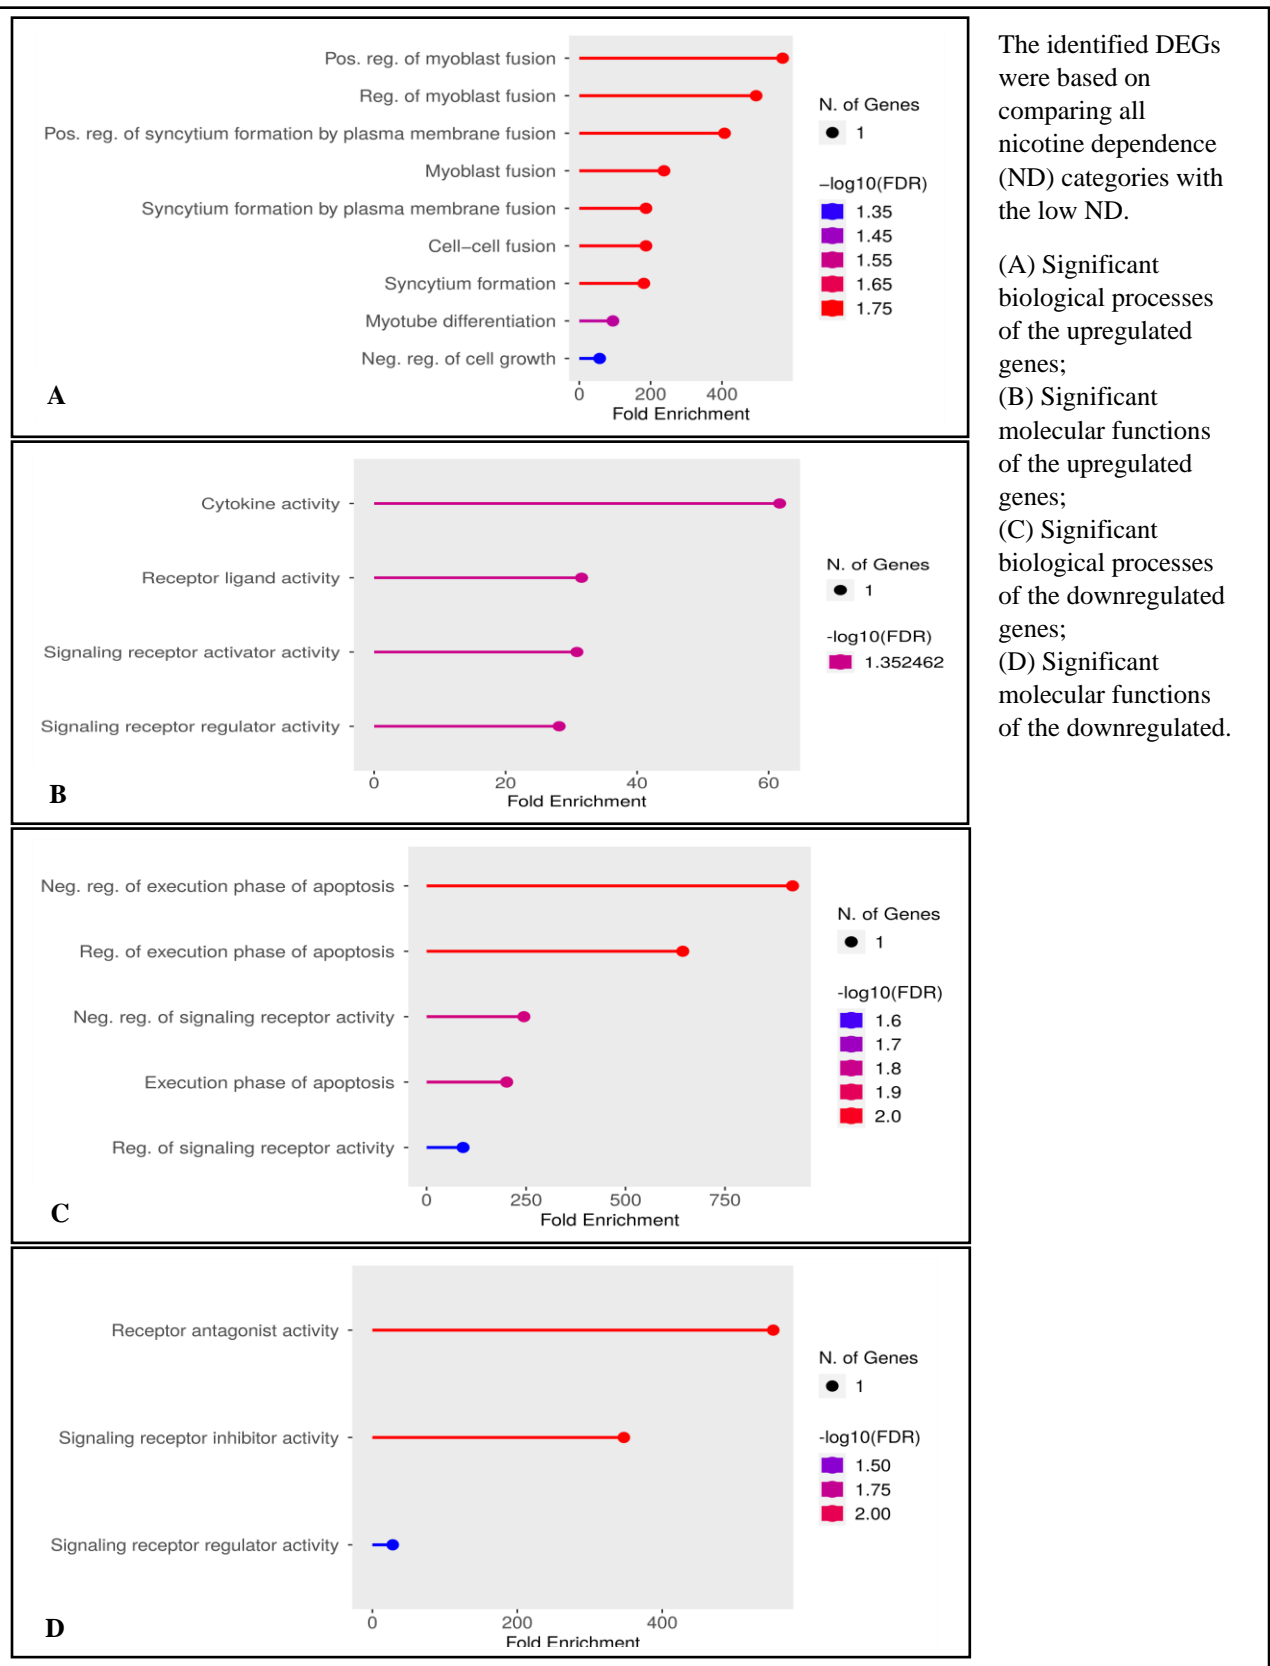

**Figure S3.** GO analysis of the DEGs among smokers categorized based on nicotine dependence.
